# Supplementary material
Source: PubMed Central journal article supplement (PMC3131882)

siControl

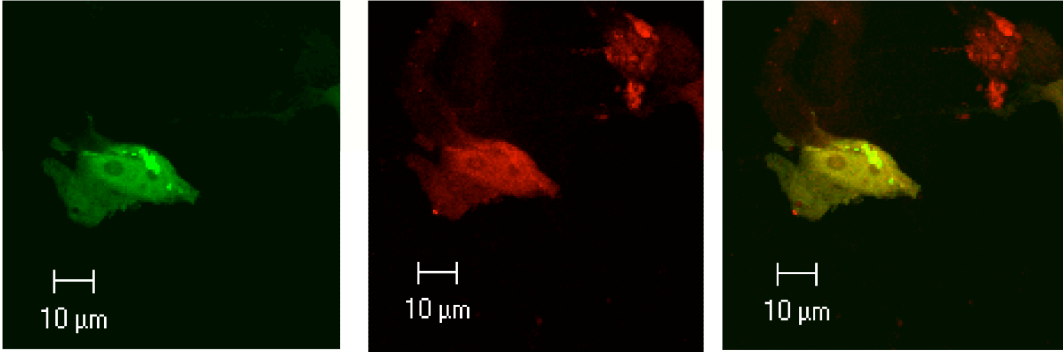

siSPP1

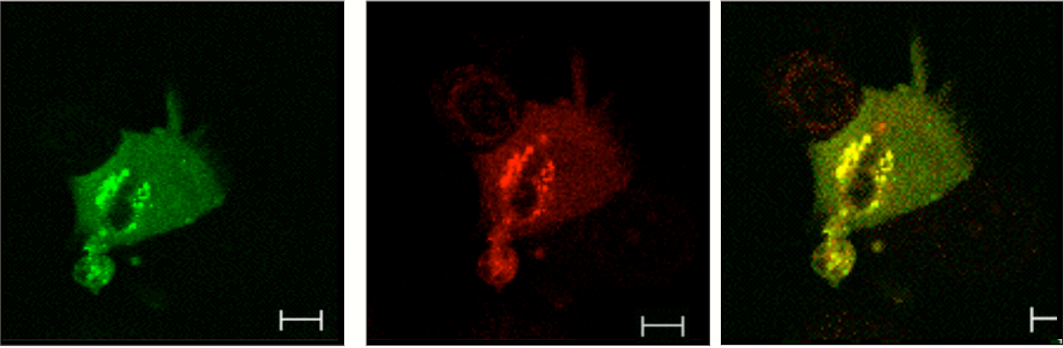

Supplemental Figure 1

Supplement: cdd2010104x1.pdf [file cdd2010104x1.pdf]
